# Supplementary material
Source: PubMed Central journal article supplement (PMC2769086)
Supplement: NIHMS138605-supplement-1.pdf [file NIHMS138605-supplement-1.pdf]

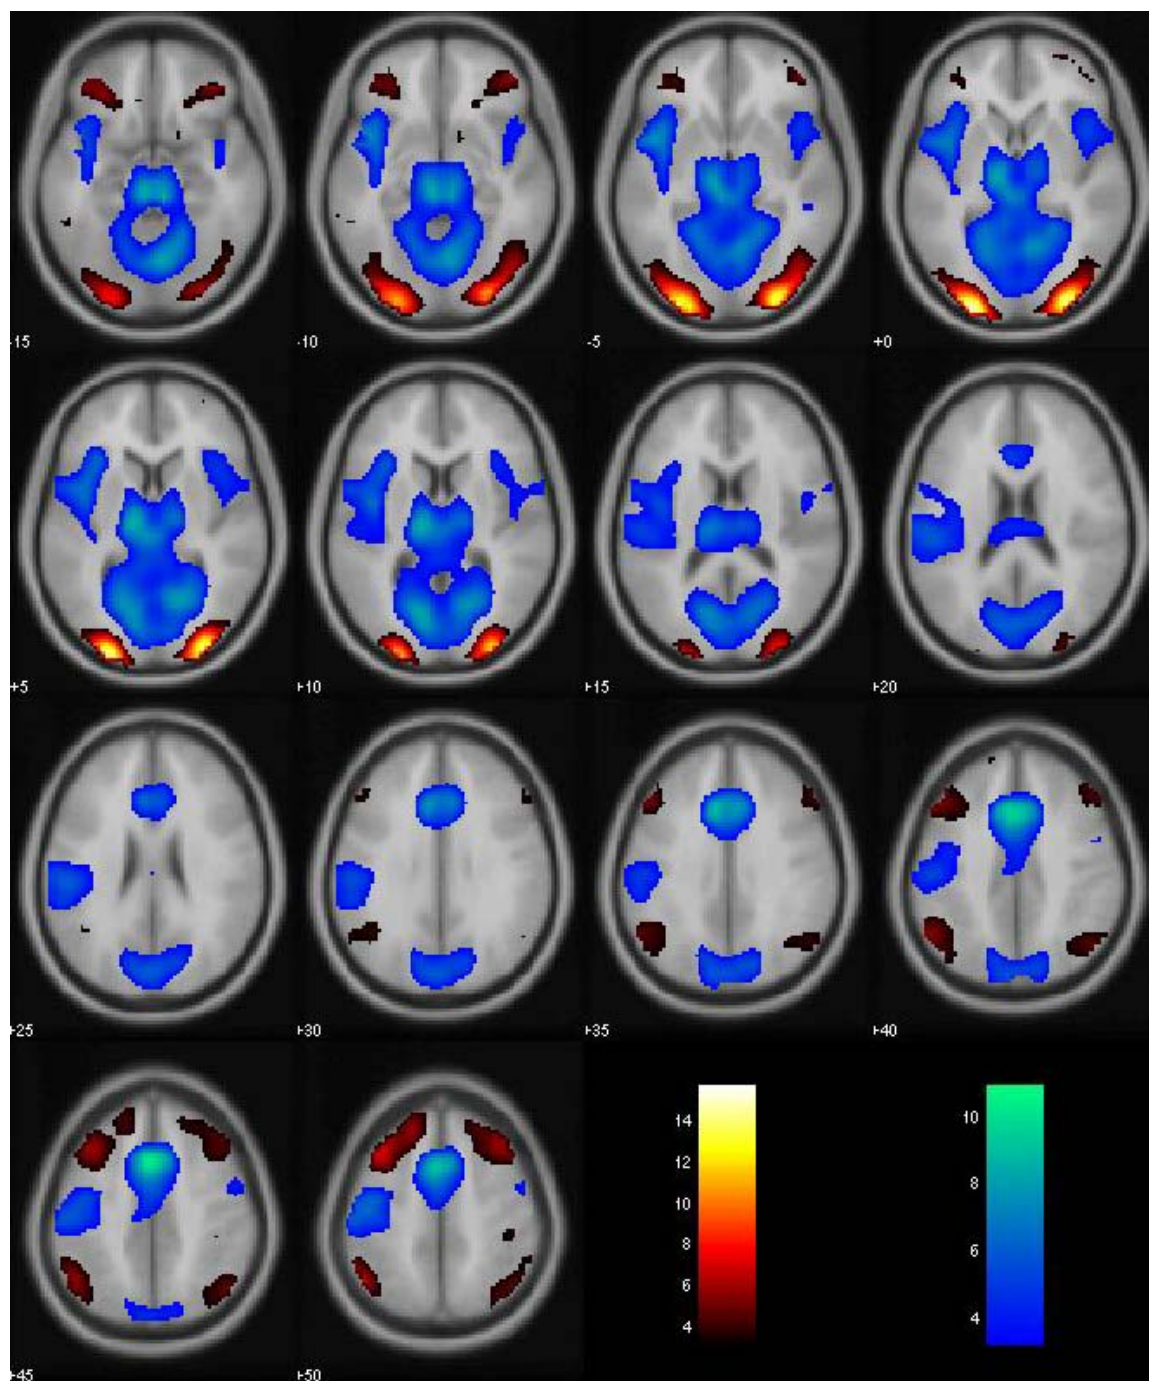

**Duann et al. Supplementary Figure 1.** Regional brain activation during stop success (SS) > stop error (SE), warm color; and during SE > SS, winter color.  $P < 0.001$ , uncorrected. With small volume correction for the rIFC mask, the area showed greater activation at  $x = -44$ ,  $y = 44$ ,  $z = -12$ ,  $p < 0.05$ , corrected for FWE.

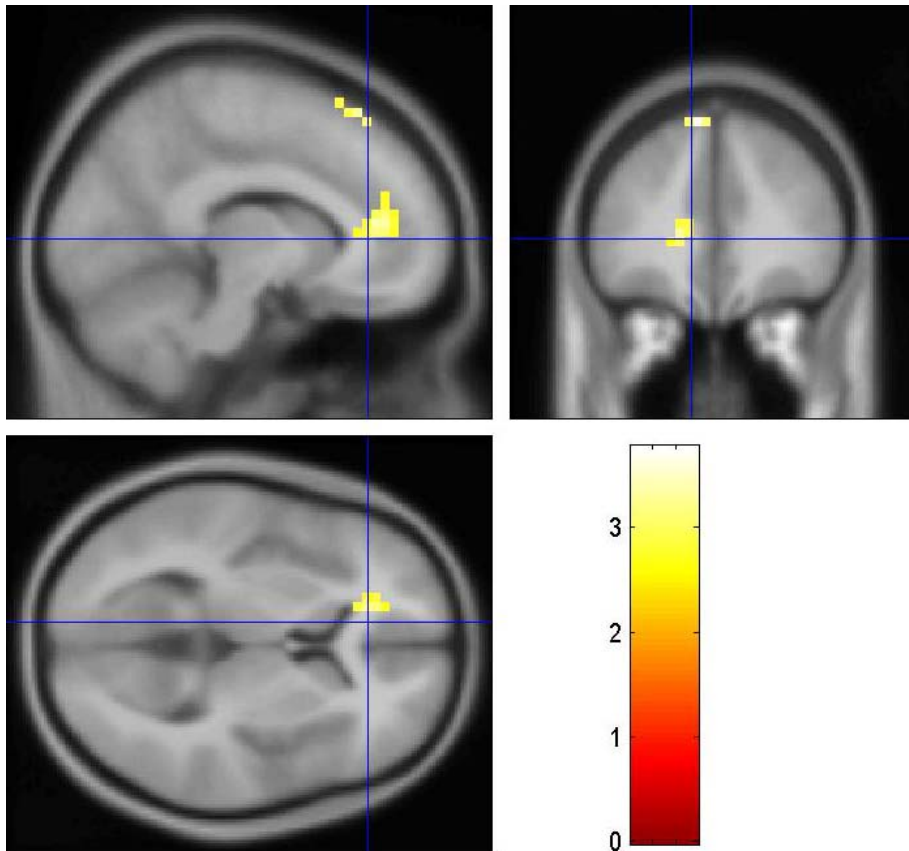

**Duann et al. Supplementary Figure 2.** Brain regions showing greater activation for the contrast stop success > stop error, in subjects with short, as compared to those with long SSRT.  $P < 0.005$ , uncorrected. With small volume correction for the preSMA mask, the area showed greater activation at  $x = -8$ ,  $y = 36$ ,  $z = 56$ ,  $p < 0.05$ , corrected for FWE.
